# Supplementary material for: New Instrument to Measure Hospital Patient Experiences in Flanders
Source: PubMed Central journal article supplement (PMC5707958; doi:10.3390/ijerph14111319), 2017-10-30
Supplement: ijerph-14-01319-s001.pdf [file ijerph-14-01319-s001.pdf]

## VLAAMSE PATIËNTEN PEILING 2.0

### IN TE VULLEN DOOR EEN MEDEWERKER VAN HET ZIEKENHUIS

|                       |                             |                            |
|-----------------------|-----------------------------|----------------------------|
| Naam ziekenhuis:      |                             |                            |
| Type bed (kenletter): | <input type="checkbox"/> C  | <input type="checkbox"/> D |
|                       | <input type="checkbox"/> G  | <input type="checkbox"/> M |
|                       | <input type="checkbox"/> Sp |                            |

|                     |                                               |
|---------------------|-----------------------------------------------|
| Code vragenlijst:   |                                               |
| Wijze van afname:   | <input type="checkbox"/> Papieren versie      |
|                     | <input type="checkbox"/> Elektronische versie |
| Ziekenhuisafdeling: |                                               |

### IN TE VULLEN DOOR DE PATIËNT ZELF

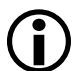

Indien u moeilijkheden heeft bij het invullen, kan u hulp vragen aan familie of vrienden. Om uw antwoorden niet te laten beïnvloeden, mogen ziekenhuismedewerkers u niet helpen.

| A. Aard van het ziekenhuisverblijf (kruis één van de mogelijkheden aan) |                                                                                                                                      |
|-------------------------------------------------------------------------|--------------------------------------------------------------------------------------------------------------------------------------|
| 1. Was uw ziekenhuisverblijf gepland?                                   | <input type="checkbox"/> <b>Nee</b> , de datum was niet vooraf bepaald.<br>→ Ga naar C. 'Informatieverstrekking over de aandoening'. |
|                                                                         | <input type="checkbox"/> <b>Ja</b> , de datum was vooraf bepaald.<br>→ Ga naar B. 'Vorbereiding op opname'.                          |

| B. Vorbereiding op de opname (deze 3 vragen enkel invullen indien uw opname gepland was)                                                 |     |    |
|------------------------------------------------------------------------------------------------------------------------------------------|-----|----|
|                                                                                                                                          | Nee | Ja |
| 2. Ik kreeg van mijn verwijzende arts vooraf informatie over hoe ik mij moest voorbereiden op deze opname in het ziekenhuis.             |     |    |
| 3. Ik kreeg van de medewerkers van het ziekenhuis vooraf informatie over hoe ik mij moest voorbereiden op deze opname in het ziekenhuis. |     |    |
| 4. Ik kreeg vooraf informatie over de kosten van mijn opname in het ziekenhuis.                                                          |     |    |

| C. Informatieverstrekking over de aandoening (vanaf hier in te vullen door alle patiënten)                                                                                                                                                                                      |       |      |         |        |
|---------------------------------------------------------------------------------------------------------------------------------------------------------------------------------------------------------------------------------------------------------------------------------|-------|------|---------|--------|
| Hieronder gaan een aantal vragen over “ <b>de medewerkers</b> ”. Hiermee worden <i>alle</i> medewerkers in het ziekenhuis bedoeld, niet alleen het medisch en verpleegkundig personeel, maar ook de kinesitherapeuten, maatschappelijk werkers, poetsdienst, secretariaat, etc. |       |      |         |        |
|                                                                                                                                                                                                                                                                                 | Nooit | Soms | Meestal | Altijd |
| 5. De medewerkers informeerden mij over de oorzaken van mijn aandoening.                                                                                                                                                                                                        |       |      |         |        |
| 6. De medewerkers informeerden mij over de mogelijke behandelingswijzen voor mijn aandoening.                                                                                                                                                                                   |       |      |         |        |
| 7. De medewerkers informeerden mij over de gevolgen van mijn aandoening.                                                                                                                                                                                                        |       |      |         |        |

| <b>D. Informatieverstrekking over onderzoek, behandeling of verzorging</b>                                                                                                                                      |              |             |                |               |
|-----------------------------------------------------------------------------------------------------------------------------------------------------------------------------------------------------------------|--------------|-------------|----------------|---------------|
|                                                                                                                                                                                                                 | <b>Nooit</b> | <b>Soms</b> | <b>Meestal</b> | <b>Altijd</b> |
| 8. De medewerkers vertelden mij voor een onderzoek, behandeling of verzorging wat er precies zou gebeuren.                                                                                                      |              |             |                |               |
| 9. De medewerkers vertelden mij voor een onderzoek, behandeling of verzorging waarom iets nodig was.                                                                                                            |              |             |                |               |
| 10. De medewerkers vertelden mij voor een onderzoek, behandeling of verzorging wat de mogelijke gevolgen kunnen zijn.                                                                                           |              |             |                |               |
| 11. De medewerkers spoorden mij aan om mee te beslissen over welk onderzoek, behandeling of verzorging ik kreeg.                                                                                                |              |             |                |               |
| <b>E. Wijze van omgaan met patiënten en samenwerking tussen zorgverleners</b>                                                                                                                                   |              |             |                |               |
|                                                                                                                                                                                                                 | <b>Nooit</b> | <b>Soms</b> | <b>Meestal</b> | <b>Altijd</b> |
| 12. De verpleegkundigen gaven mij begrijpelijke uitleg.                                                                                                                                                         |              |             |                |               |
| 13. De verpleegkundigen waren vriendelijk en beleefd tegen mij.                                                                                                                                                 |              |             |                |               |
| 14. De artsen gaven mij begrijpelijke uitleg.                                                                                                                                                                   |              |             |                |               |
| 15. De artsen waren vriendelijk en beleefd tegen mij.                                                                                                                                                           |              |             |                |               |
| 16. De medewerkers gaven gelijkaardige informatie.                                                                                                                                                              |              |             |                |               |
| 17. De medewerkers werkten goed samen.                                                                                                                                                                          |              |             |                |               |
| 18. Bij de medewerkers voelde ik mij in veilige handen.                                                                                                                                                         |              |             |                |               |
| <b>F. Privacy</b>                                                                                                                                                                                               |              |             |                |               |
|                                                                                                                                                                                                                 | <b>Nooit</b> | <b>Soms</b> | <b>Meestal</b> | <b>Altijd</b> |
| 19. De medewerkers respecteerden mijn privacy tijdens gesprekken.                                                                                                                                               |              |             |                |               |
| 20. De medewerkers respecteerden mijn privacy tijdens onderzoeken, behandeling en verzorging.                                                                                                                   |              |             |                |               |
| <b>G. Veilige zorg</b>                                                                                                                                                                                          |              |             |                |               |
|                                                                                                                                                                                                                 | <b>Nooit</b> | <b>Soms</b> | <b>Meestal</b> | <b>Altijd</b> |
| 21. De medewerkers stelden zich aan mij voor met naam en functie.                                                                                                                                               |              |             |                |               |
| 22. De medewerkers controleerden mijn naam, voornaam, geboortedatum en identificatiebandje bij onderzoeken, behandeling en verzorging.                                                                          |              |             |                |               |
| <b>H. Pijn</b>                                                                                                                                                                                                  |              |             |                |               |
|                                                                                                                                                                                                                 | <b>Nooit</b> | <b>Soms</b> | <b>Meestal</b> | <b>Altijd</b> |
| 23. De medewerkers vroegen voldoende naar mijn pijn.                                                                                                                                                            |              |             |                |               |
| 24. Mijn pijn werd goed onder controle gehouden.                                                                                                                                                                |              |             |                |               |
| <b>I. Ontslag uit het ziekenhuis</b>                                                                                                                                                                            |              |             |                |               |
|                                                                                                                                                                                                                 |              |             | <b>Nee</b>     | <b>Ja</b>     |
| 25. Ik kon mee beslissen over het moment van mijn ontslag.                                                                                                                                                      |              |             |                |               |
| 26. Ik voelde me klaar om naar huis te gaan.                                                                                                                                                                    |              |             |                |               |
| 27. Ik kreeg informatie over de verdere behandeling na mijn ontslag uit het ziekenhuis (bv. over regels voor levensstijl, rust en werken, het gebruik van medicijnen of hulpmiddelen, controle-afspraken, ...). |              |             |                |               |

### J. Algemene beoordeling

28. Welk cijfer zou u dit ziekenhuis geven voor deze opname, als 0 gelijk is aan het slechtst mogelijke en 10 gelijk is aan het best mogelijke ziekenhuis?

0     1     2     3     4     5     6     7     8     9     10

|                                                                 | Zeker niet | Waar-schijnlijk niet | Waar-schijnlijk wel | Zeker wel |
|-----------------------------------------------------------------|------------|----------------------|---------------------|-----------|
| 29. Zou u dit ziekenhuis aanbevelen aan uw vrienden en familie? |            |                      |                     |           |

### K. Enkele vragen over uzelf

|                  |                                |                      |                                                                                    |
|------------------|--------------------------------|----------------------|------------------------------------------------------------------------------------|
| <b>Geslacht:</b> | <input type="checkbox"/> Vrouw | <b>Woonsituatie:</b> | <input type="checkbox"/> Ik woon alleen                                            |
|                  | <input type="checkbox"/> Man   |                      | <input type="checkbox"/> Ik woon samen met mijn partner, familie of vrienden       |
|                  |                                |                      | <input type="checkbox"/> Ik woon in een serviceflat, begeleid wonen, rustoord, ... |

|                                   |                                       |                   |                                                         |                                        |
|-----------------------------------|---------------------------------------|-------------------|---------------------------------------------------------|----------------------------------------|
| <b>Leeftijd:</b>                  | <input type="checkbox"/> -18 jaar     | <b>Provincie:</b> | <input type="checkbox"/> Oost-Vlaanderen                | <input type="checkbox"/> Henegouwen    |
|                                   | <input type="checkbox"/> 18 - 24 jaar |                   | <input type="checkbox"/> West-Vlaanderen                | <input type="checkbox"/> Namen         |
|                                   | <input type="checkbox"/> 25 - 34 jaar |                   | <input type="checkbox"/> Antwerpen                      | <input type="checkbox"/> Luik          |
|                                   | <input type="checkbox"/> 35 - 44 jaar |                   | <input type="checkbox"/> Limburg                        | <input type="checkbox"/> Luxemburg     |
|                                   | <input type="checkbox"/> 45 - 54 jaar |                   | <input type="checkbox"/> Vlaams-Brabant                 | <input type="checkbox"/> Waals-Brabant |
|                                   | <input type="checkbox"/> 55 - 64 jaar |                   | <input type="checkbox"/> Brussels Hoofdstedelijk Gewest | <input type="checkbox"/> Buitenland    |
|                                   | <input type="checkbox"/> 65 - 74 jaar |                   |                                                         |                                        |
|                                   | <input type="checkbox"/> 75 - 84 jaar |                   |                                                         |                                        |
| <input type="checkbox"/> 85+ jaar |                                       |                   |                                                         |                                        |

|                                                                     |                                 |                                   |                               |                                    |
|---------------------------------------------------------------------|---------------------------------|-----------------------------------|-------------------------------|------------------------------------|
| <b>Hoe zou u in het algemeen uw gezondheidstoestand beoordelen?</b> | <input type="checkbox"/> Slecht | <input type="checkbox"/> Redelijk | <input type="checkbox"/> Goed | <input type="checkbox"/> Zeer goed |
|---------------------------------------------------------------------|---------------------------------|-----------------------------------|-------------------------------|------------------------------------|

|                                                                                                                      |                                          |                                              |                                                             |                                                 |
|----------------------------------------------------------------------------------------------------------------------|------------------------------------------|----------------------------------------------|-------------------------------------------------------------|-------------------------------------------------|
| <b>Wat is het hoogste opleidingsniveau dat u voltooid hebt?</b><br>(opleiding afgerond met diploma of getuigschrift) | <input type="checkbox"/> Lager onderwijs | <input type="checkbox"/> Secundair onderwijs | <input type="checkbox"/> Hoger, niet universitair onderwijs | <input type="checkbox"/> Universitair onderwijs |
|----------------------------------------------------------------------------------------------------------------------|------------------------------------------|----------------------------------------------|-------------------------------------------------------------|-------------------------------------------------|

|                                            | Ja                                        | Neen                                       |                                |
|--------------------------------------------|-------------------------------------------|--------------------------------------------|--------------------------------|
| <b>Hebt u de Belgische nationaliteit?</b>  |                                           | Zo niet, vul hier uw nationaliteit in:     |                                |
| <b>Bent u in België geboren?</b>           |                                           | Zo niet, vul hier uw land van herkomst in: |                                |
| <b>Welke taal spreekt u meestal thuis?</b> | <input type="checkbox"/> Nederlands       | <input type="checkbox"/> Frans             | <input type="checkbox"/> Duits |
|                                            | <input type="checkbox"/> Ander, namelijk: |                                            |                                |
